# Supplementary material for: Predictive performance of selected breath volatile organic carbon compounds in stage 1 lung cancer
Source: PubMed Central journal article supplement — Transl Lung Cancer Res. 2022 Jun;11(6):1009–18. doi: 10.21037/tlcr-21-953 (PMC9271440; doi:10.21037/tlcr-21-953), 2022-06
Supplement: tlcr-11-06-1009-dss.pdf [file tlcr-11-06-1009-dss.pdf]

## Data Sharing Statement

|                     |                                                                                                                                                    |                                                                                                                   |
|---------------------|----------------------------------------------------------------------------------------------------------------------------------------------------|-------------------------------------------------------------------------------------------------------------------|
| <b>Article Info</b> | <a href="https://dx.doi.org/10.21037/tlcr-21-953">https://dx.doi.org/10.21037/tlcr-21-953</a>                                                      |                                                                                                                   |
| <b>Item</b>         | <b>Question</b>                                                                                                                                    | <b>Authors' Response<br/>(place "-" if not applicable)</b>                                                        |
| 1                   | Would you like to share data collected for your study to others?                                                                                   | No                                                                                                                |
| 2                   | If not, would you like to share the reason for your decision?                                                                                      | Unfortunately our consent form did not specifically state that we will share the data outside of our researchers. |
| 3                   | What data in particular will be shared?                                                                                                            | -                                                                                                                 |
| 4                   | Any other documents will be share? Such as study protocol, statistical analysis plan, informed consent form, clinical study report, analytic code. | We will share other documents, such as the study protocol, by request.                                            |
| 5                   | When will data availability begin?                                                                                                                 | From the publication of this article                                                                              |
| 6                   | When will data availability end?                                                                                                                   | Five years                                                                                                        |
| 7                   | To whom will you share the data?                                                                                                                   | Researchers                                                                                                       |
| 8                   | For what type of analysis or purpose?                                                                                                              | No limit                                                                                                          |
| 9                   | How or where can the data/documents be obtained?                                                                                                   | Contact the corresponding author                                                                                  |
| 10                  | Any other restrictions?                                                                                                                            | No                                                                                                                |
